# Supplementary material for: NLRC4 gene silencing-dependent blockade of NOD-like receptor pathway inhibits inflammation, reduces proliferation and increases apoptosis of dendritic cells in mice with septic shock
Source: Aging (Albany NY). 2021 Jan 6;13(1):1440–57. doi: 10.18632/aging.202379 (PMC7835030; doi:10.18632/aging.202379)
Supplement: Supplementary Figure 1 [file aging-13-202379-s001.pdf]

SUPPLEMENTARY FIGURE

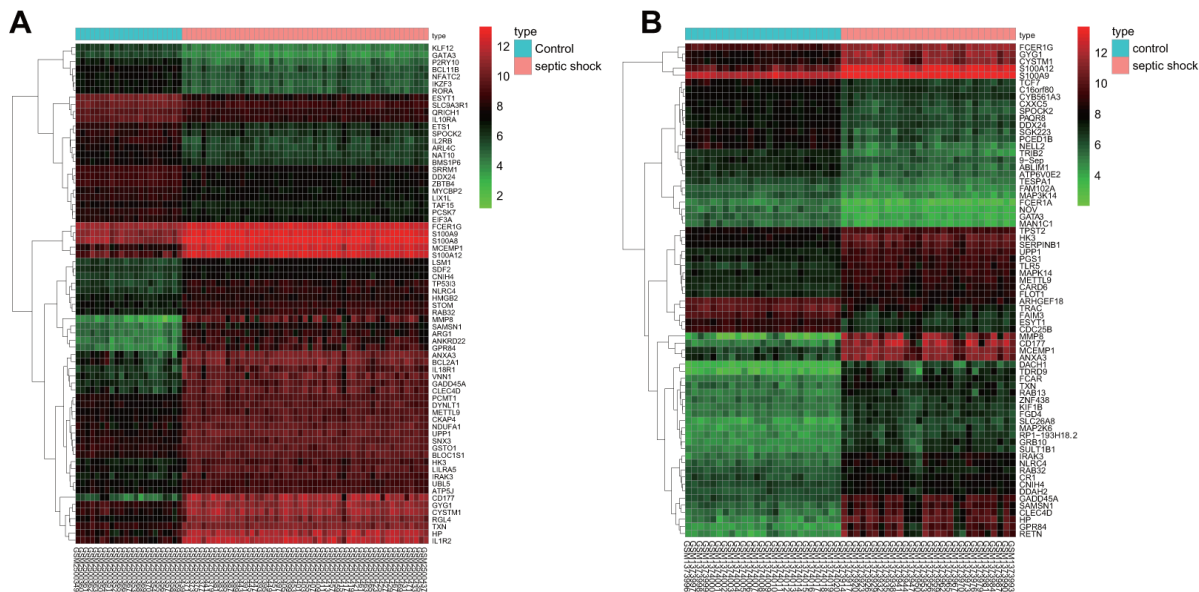

**Supplementary Figure 1.** Heatmaps illustrating the DEGs in microarray data GSE95233 and GSE57065 related to septic shock. (A, B) the former 70 DEGs in the microarray expression profiles GSE95233 and GSE57065 (the abscissa stands for the sample number; the ordinate refers to the DEGs; the histogram in upper right is the color gradation; each rectangle in the figure refers to a sample expression value).
